# Supplementary material for: Preorganized helical chirality controlled homochiral self-assembly and circularly polarized luminescence of a quadruple-stranded Eu2L4 helicate
Source: Royal Society of Chemistry journal article supplement (doi:10.1039/d0dt00062k), 2020-01-01
Supplement: d0dt00062k1.pdf [file d0dt00062k1.pdf]

## Supplementary Information

### Preorganized helical chirality controlled homochiral self-assembly and circularly polarized luminescence in a quadruple-stranded Eu<sub>2</sub>L<sub>4</sub> helicate

Guoying Han, Yanyan Zhou, Yuan Yao, Zhenyu Cheng, Ting Gao, Hongfeng Li,\* and Pengfei Yan\*

Key Laboratory of Functional Inorganic Material Chemistry, Ministry of Education, P. R. China; School of Chemistry and Materials Science, Heilongjiang University, Harbin 150080, P. R. China.

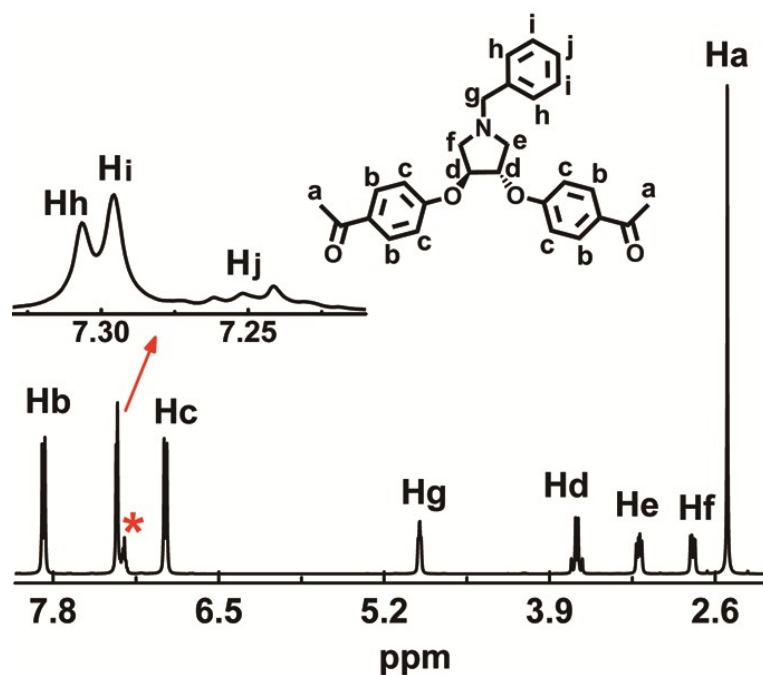

Figure S1. <sup>1</sup>H NMR spectrum of (S,S)-4a in CDCl<sub>3</sub>.

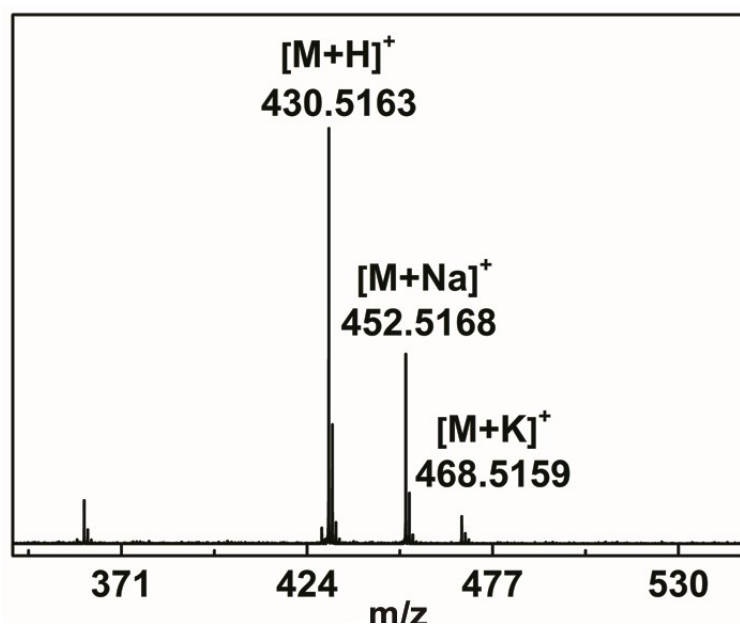

Figure S2. ESI-TOF-MS of (S,S)-4a.

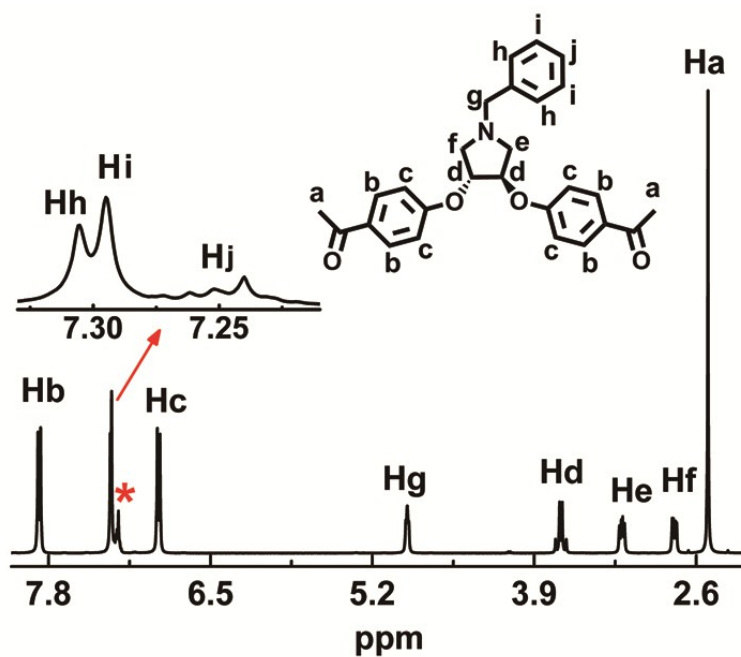

Figure S3. <sup>1</sup>H NMR spectrum of (R,R)-4a in CDCl<sub>3</sub>.

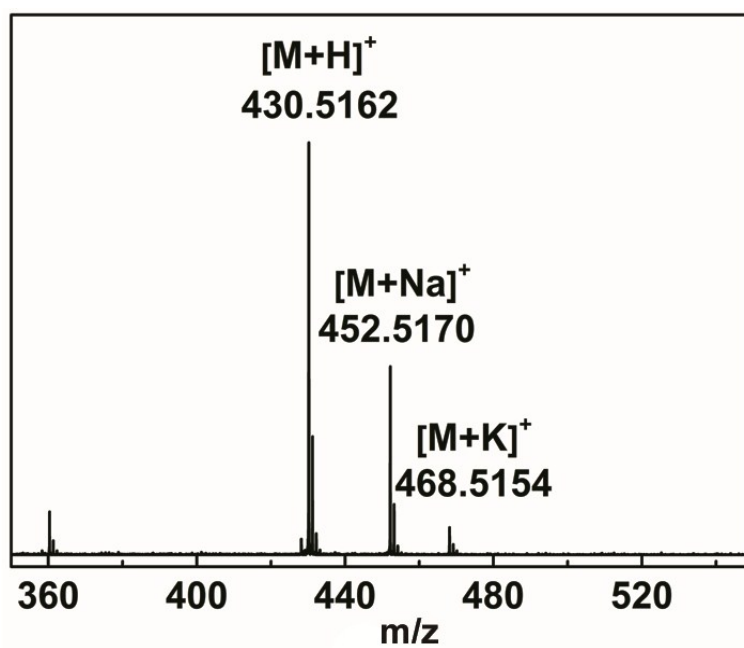

Figure S4. ESI-TOF-MS of (R,R)-4a.

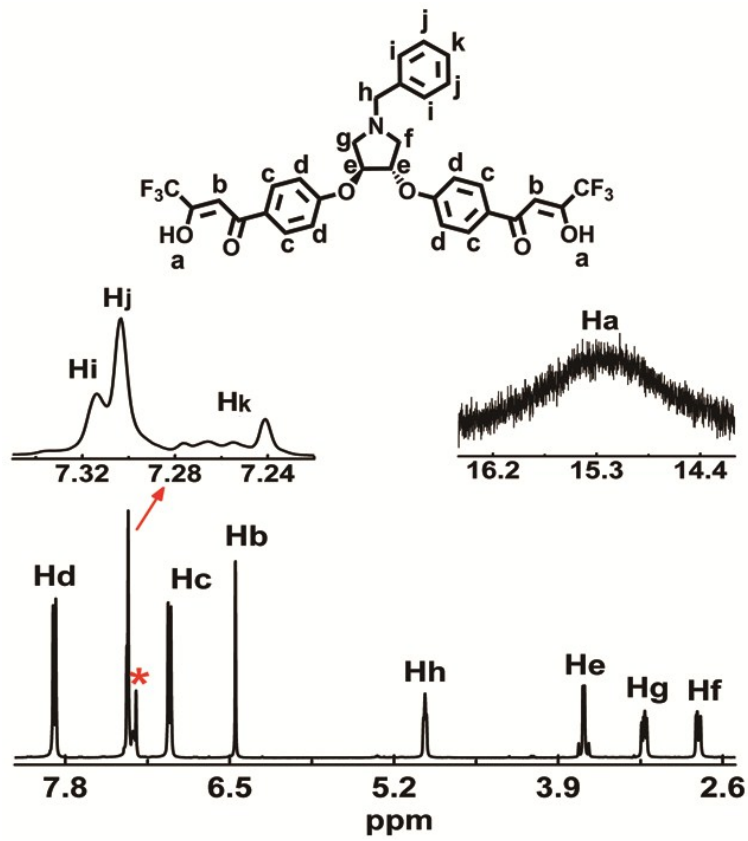

Figure S5. <sup>1</sup>H NMR spectrum of **L<sup>SS</sup>** in CDCl<sub>3</sub>.

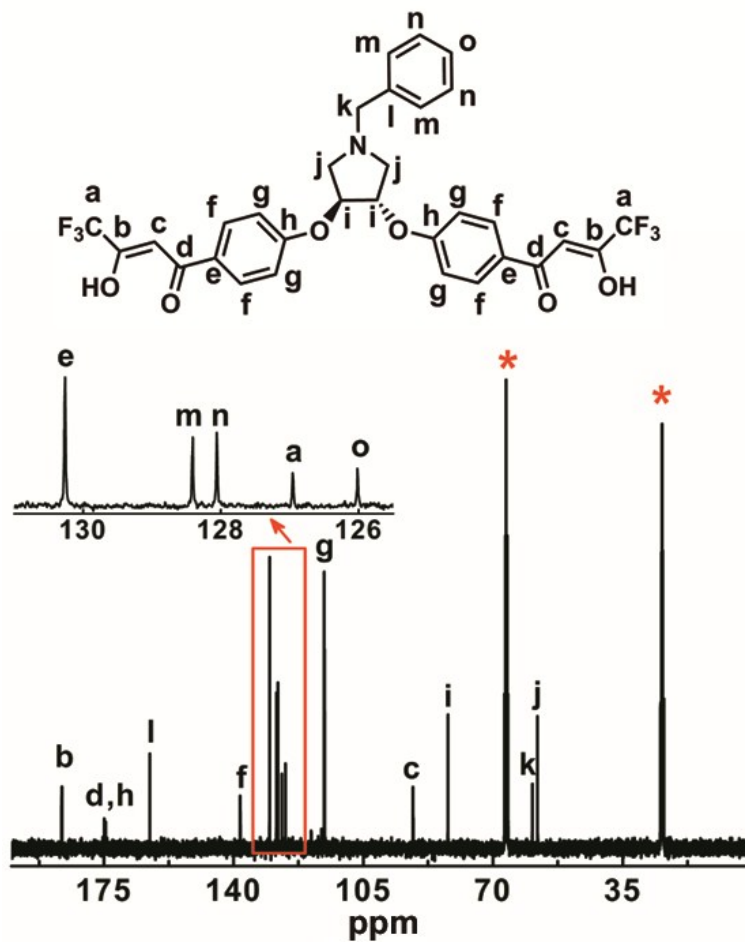

Figure S6.  $^{13}C$  NMR spectrum of  $L^{SS}$  in THF- $d_8$ .

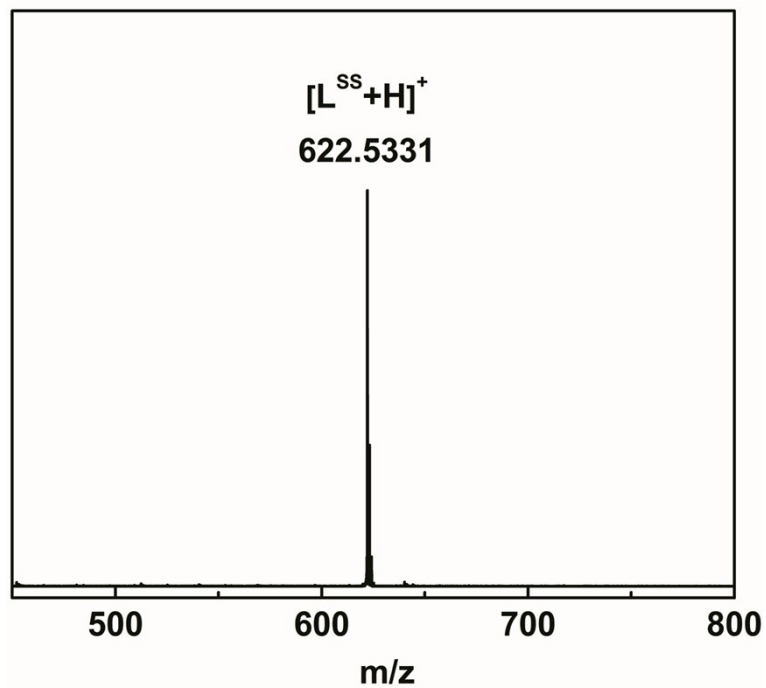

Figure S7. ESI-TOF-MS of  $L^{SS}$ .

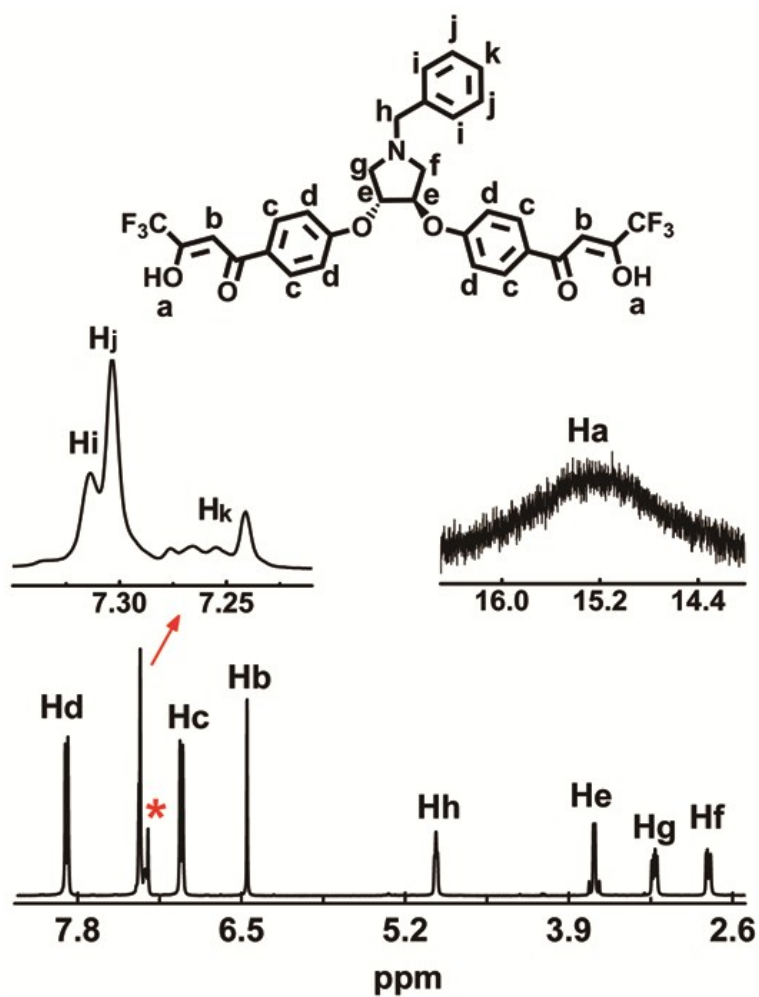

Figure S8.  $^1H$  NMR spectrum of  $L^{RR}$  in  $CDCl_3$ .

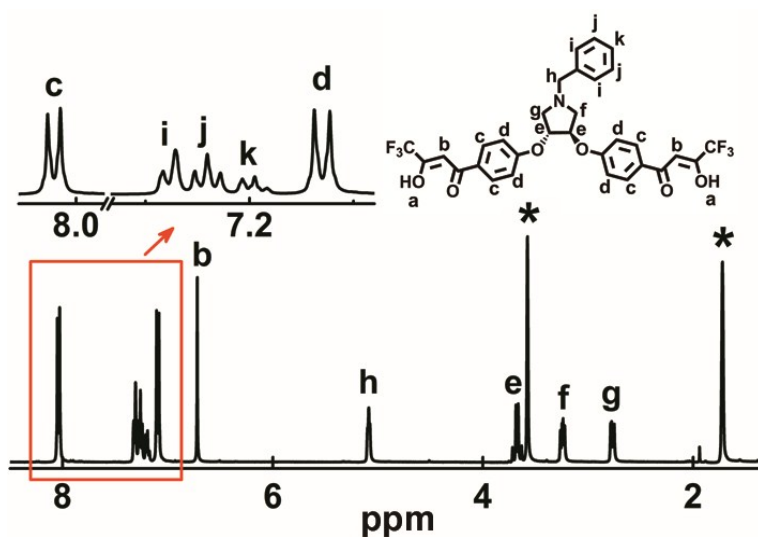

Figure S9.  $^1H$  NMR spectrum of  $L^{RR}$  in  $THF-d_8$ .

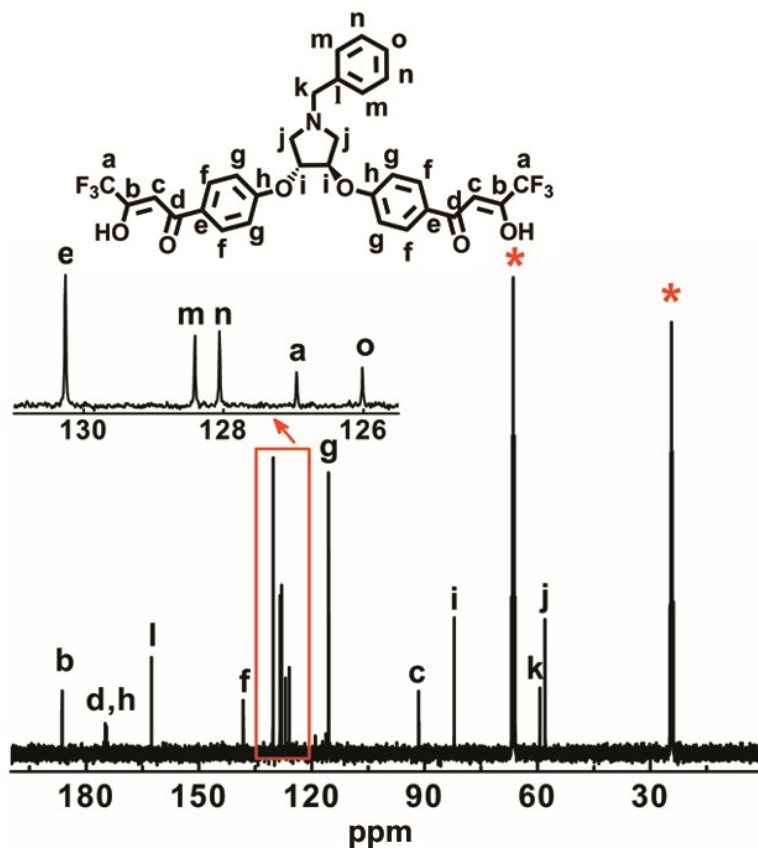

Figure S10.  $^{13}\text{C}$  NMR spectrum of  $L^{RR}$  in  $\text{THF-}d_8$ .

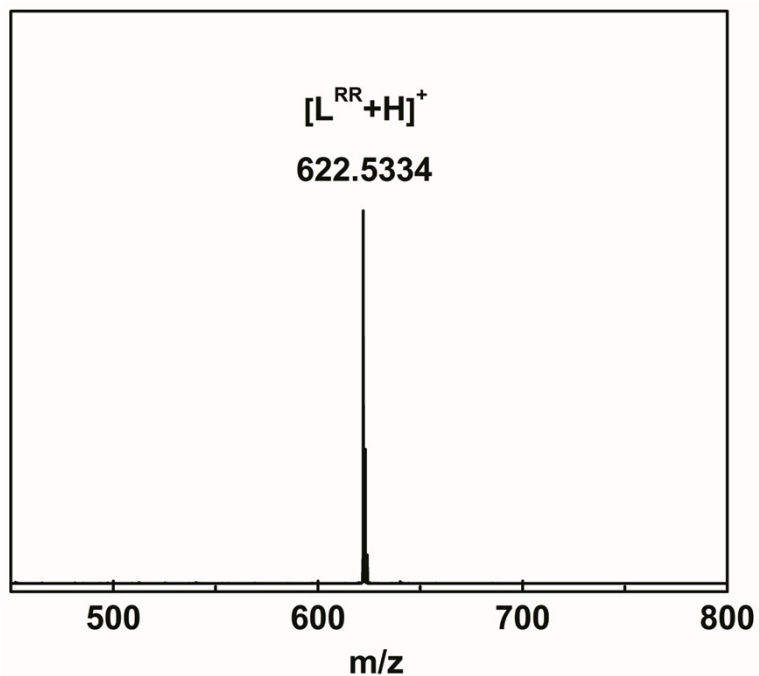

Figure S11. ESI-TOF-MS of  $L^{RR}$ .

**Table S1. Crystal data of the ligands L<sup>SS</sup> and L<sup>RR</sup>.**

|                                                       | L <sup>SS</sup>                                                 | L <sup>RR</sup>                                                 |
|-------------------------------------------------------|-----------------------------------------------------------------|-----------------------------------------------------------------|
| CCDC Number                                           | 1972802                                                         | 1972801                                                         |
| formula                                               | C <sub>31</sub> H <sub>25</sub> F <sub>6</sub> N O <sub>6</sub> | C <sub>31</sub> H <sub>25</sub> F <sub>6</sub> N O <sub>6</sub> |
| Mr                                                    | 621.52                                                          | 621.52                                                          |
| cryst syst                                            | orthorhombic                                                    | orthorhombic                                                    |
| space group                                           | <i>P</i> 2 <sub>1</sub> 2 <sub>1</sub> 2 <sub>1</sub>           | <i>P</i> 2 <sub>1</sub> 2 <sub>1</sub> 2 <sub>1</sub>           |
| <i>a</i> (Å)                                          | 9.103(5)                                                        | 9.105(5)                                                        |
| <i>b</i> (Å)                                          | 11.578(5)                                                       | 11.571(5)                                                       |
| <i>c</i> (Å)                                          | 27.425(5)                                                       | 27.397(5)                                                       |
| <i>α</i> (deg)                                        | 90                                                              | 90                                                              |
| <i>β</i> (deg)                                        | 90                                                              | 90                                                              |
| <i>γ</i> (deg)                                        | 90                                                              | 90                                                              |
| <i>V</i> (Å <sup>3</sup> )                            | 2890(2)                                                         | 2886(2)                                                         |
| <i>Z</i>                                              | 4                                                               | 4                                                               |
| <i>ρ</i> (g cm <sup>3</sup> )                         | 1.424                                                           | 1.430                                                           |
| <i>μ</i> (mm <sup>-1</sup> )                          | 0.124                                                           | 0.124                                                           |
| <i>F</i> (000)                                        | 1272.0                                                          | 1280.0                                                          |
| <i>R</i> <sub>1</sub> , [ <i>I</i> > 2σ( <i>I</i> )]  | 0.0600                                                          | 0.0608                                                          |
| <i>wR</i> <sub>2</sub> , [ <i>I</i> > 2σ( <i>I</i> )] | 0.1513                                                          | 0.1594                                                          |
| <i>R</i> <sub>1</sub> , (all data)                    | 0.1087                                                          | 0.0987                                                          |
| <i>wR</i> <sub>2</sub> , (all data)                   | 0.1888                                                          | 0.1962                                                          |
| GOF on <i>F</i> <sup>2</sup>                          | 1.022                                                           | 1.049                                                           |

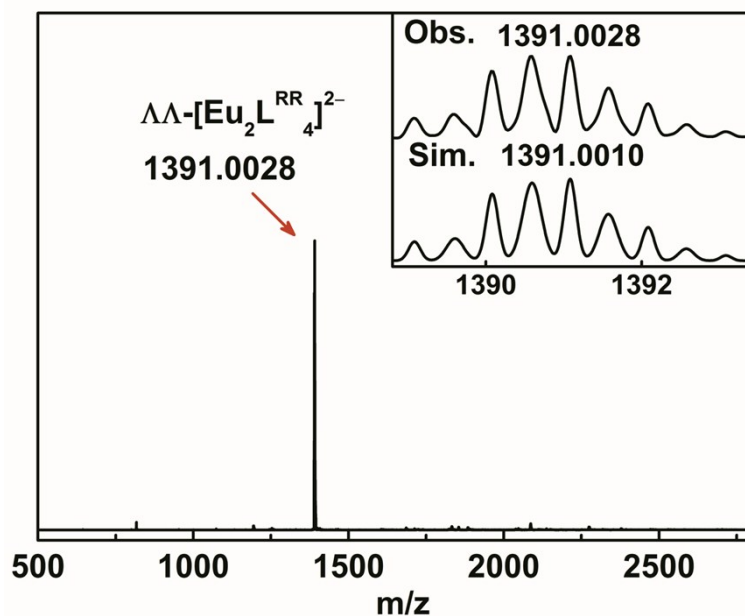

Figure S12. ESI-TOF-MS of  $\Delta\Delta\text{-}(\text{Eu}_2\text{L}^{\text{RR}}_4)^{2-}$ .

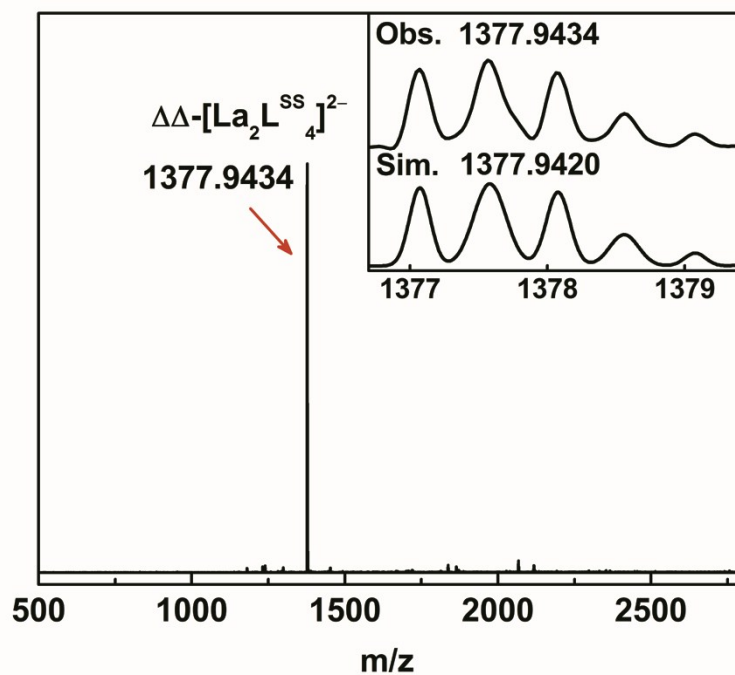

Figure S13. ESI-TOF-MS of  $\Delta\Delta\text{-}(\text{La}_2\text{L}^{\text{SS}}_4)^{2-}$ .



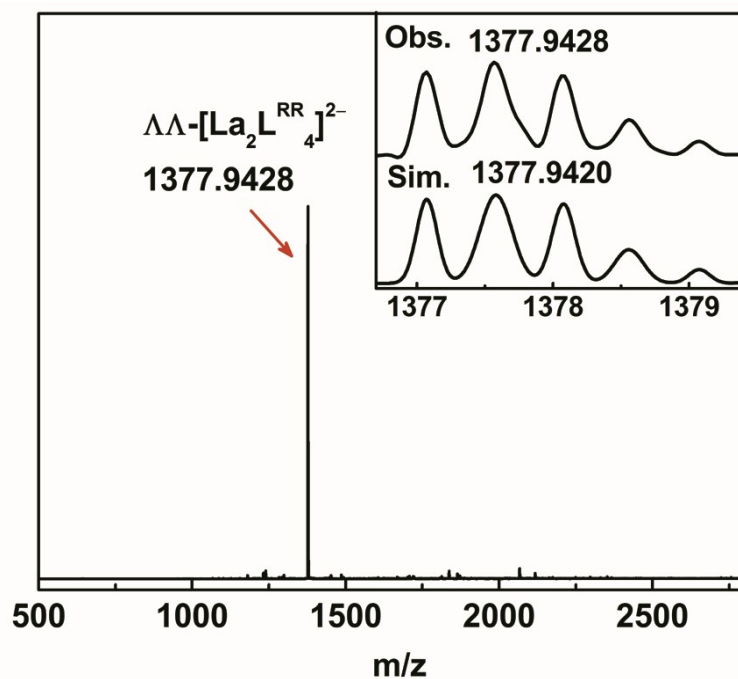

Figure S14. ESI-TOF-MS of  $\Delta\Delta\text{-}(\text{La}_2\text{L}^{\text{RR}}_4)^{2-}$ .

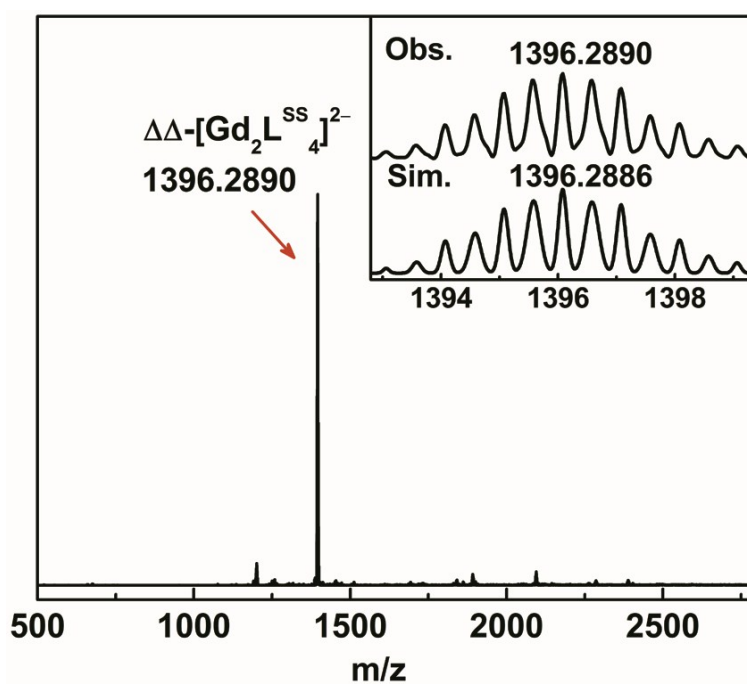

Figure S15. ESI-TOF-MS of  $\Delta\Delta\text{-}(\text{Gd}_2\text{L}^{\text{SS}}_4)^{2-}$ .

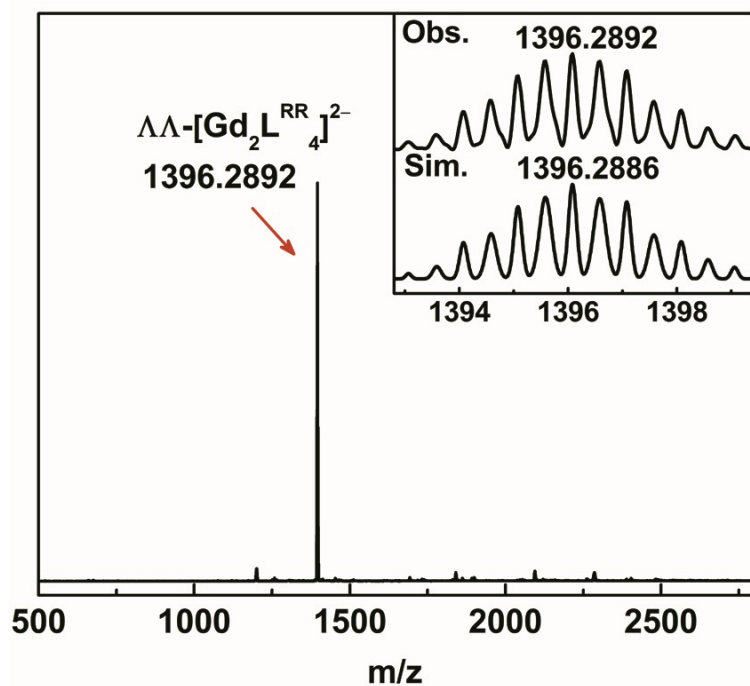

Figure S16. ESI-TOF-MS of  $\Delta\Delta\text{-}(\text{Gd}_2\text{L}^{\text{RR}}_4)^{2-}$ .

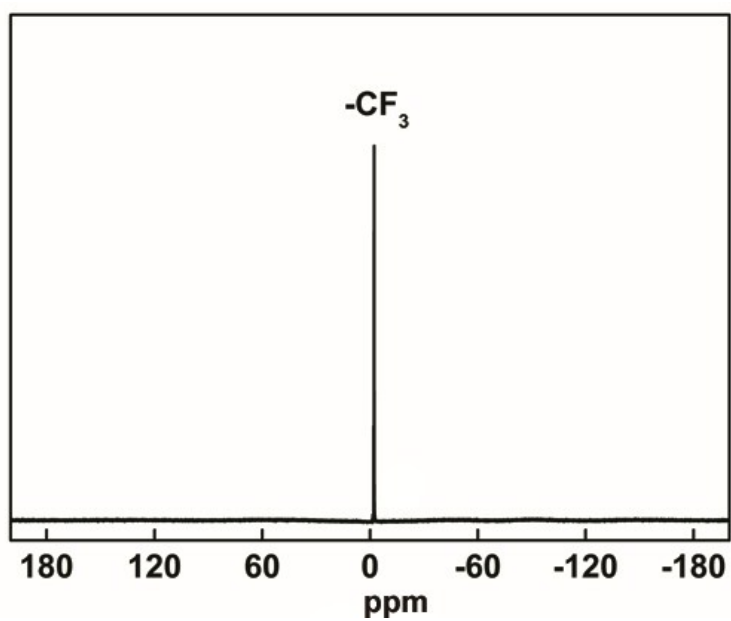

Figure S17.  $^{19}\text{F}$  NMR spectrum of  $\Delta\Delta\text{-}(\text{HNEt}_3)_2(\text{Eu}_2\text{L}^{\text{SS}}_4)$  in  $\text{THF-}d_8$ .

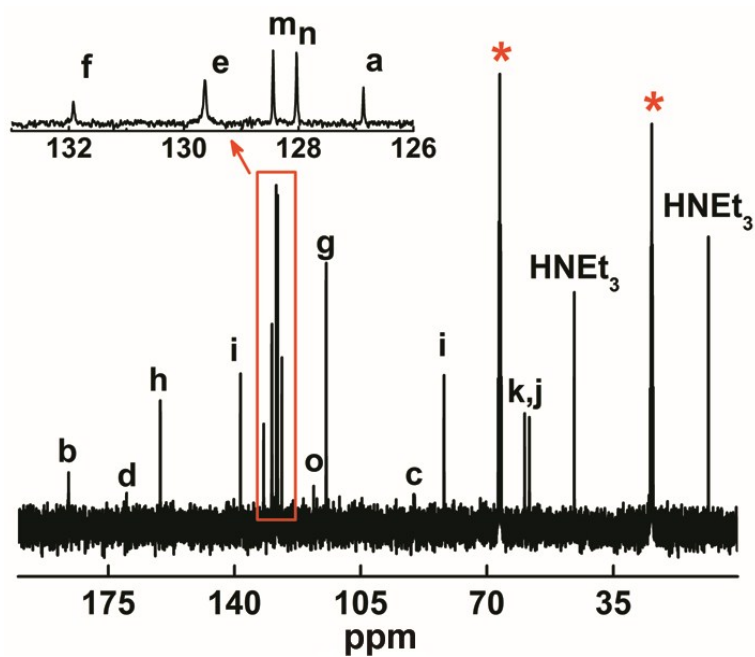

Figure S18.  $^{13}\text{C}$  NMR spectrum of  $\Delta\Delta$ -( $\text{HNEt}_3$ ) $_2$ ( $\text{La}_2\text{L}^{\text{SS}}_4$ ) in  $\text{THF-}d_8$ .

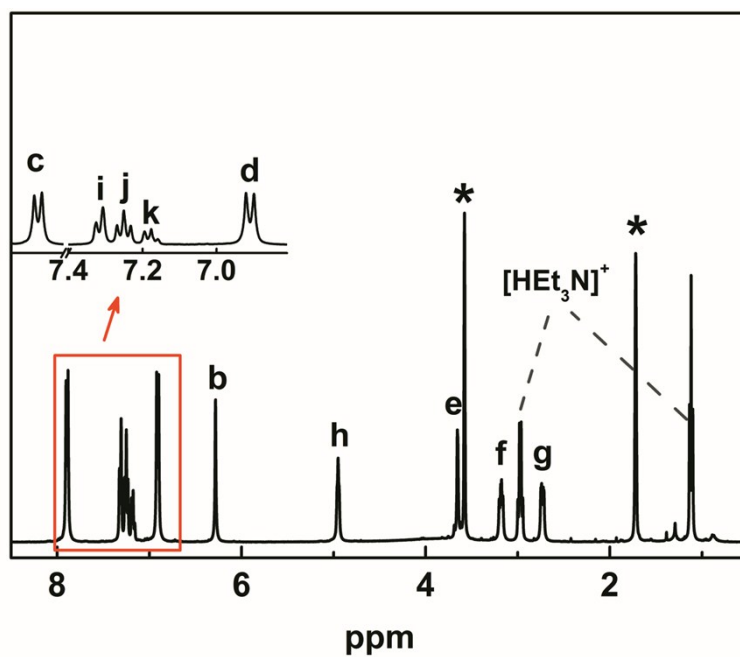

Figure S19.  $^1\text{H}$  NMR spectrum of  $\Lambda\Lambda$ -( $\text{HNEt}_3$ ) $_2$ ( $\text{La}_2\text{L}^{\text{RR}}_4$ ) in  $\text{THF-}d_8$ .

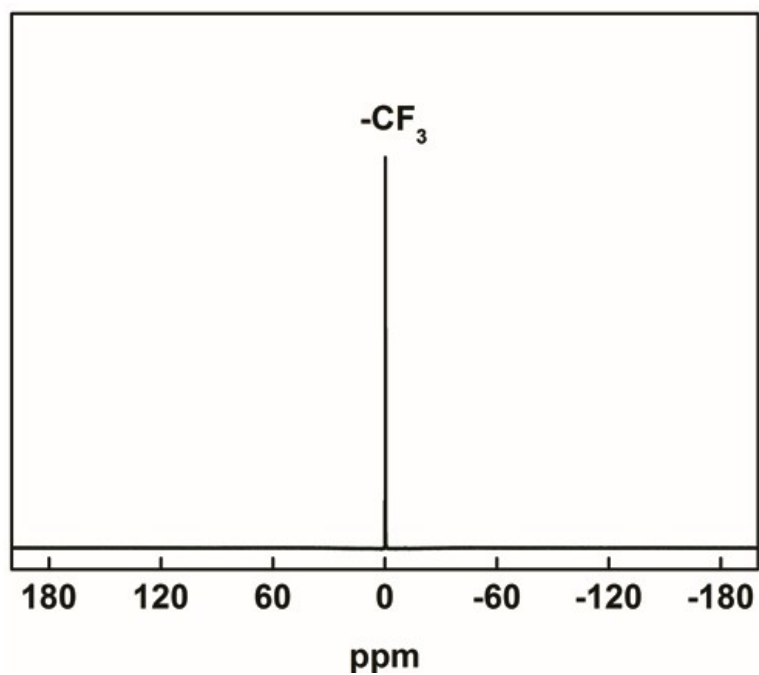

Figure S20.  $^{19}\text{F}$  NMR spectrum of  $\Lambda\Lambda\text{-(HNEt}_3)_2(\text{La}_2\text{L}^{\text{RR}_4})$  in  $\text{THF-}d_8$ .

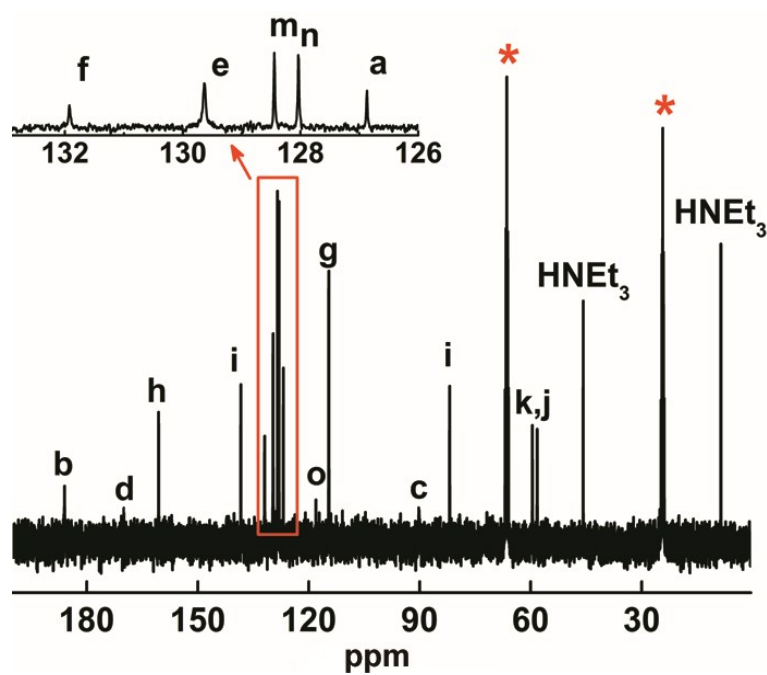

Figure S21.  $^{13}\text{C}$  NMR spectrum of  $\Lambda\Lambda\text{-(HNEt}_3)_2(\text{La}_2\text{L}^{\text{RR}_4})$  in  $\text{THF-}d_8$ .

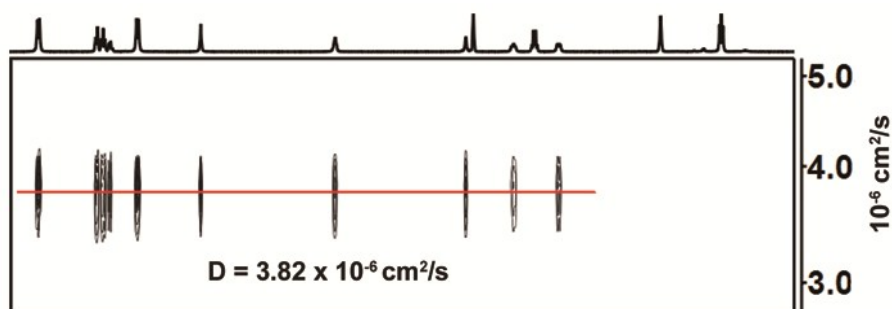

**Figure S22.**  $^1\text{H}$  DOSY spectrum of  $\Delta\Delta\text{-(HNEt}_3)_2\text{(La}_2\text{L}^{\text{RR}}_4)$  in  $\text{THF-}d_3$ .

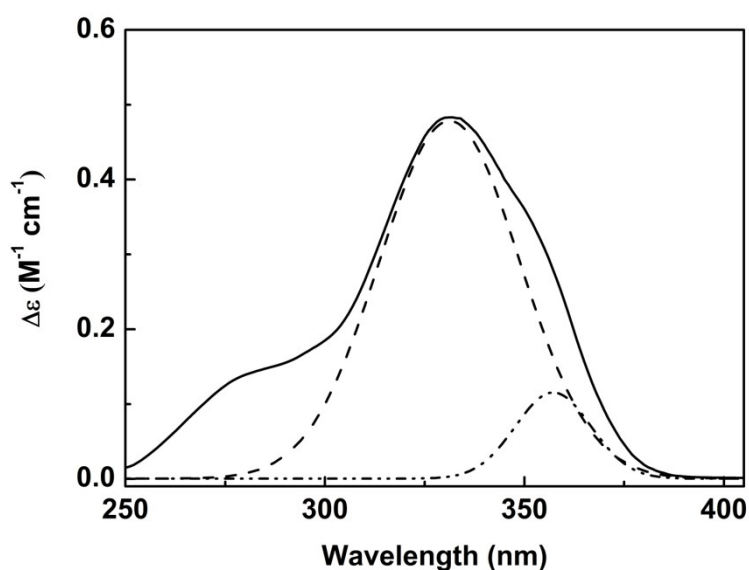

**Figure S23.** The experimental absorption spectrum of  $\Delta\Delta\text{-Eu}_2\text{L}^{\text{SS}}_4$  (solid line) and the deconvoluted Gaussian curves (dashed lines) that correspond to transitions to two excitonic states.

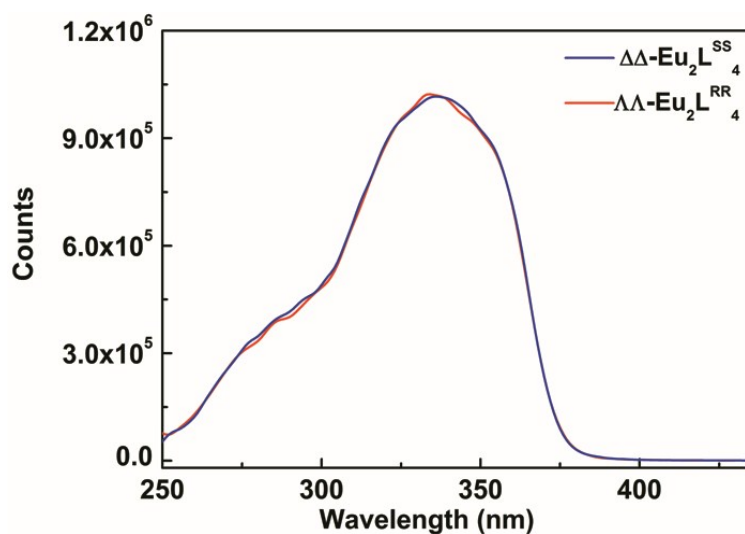

**Figure S24.** Excitation spectra of  $\Delta\Delta\text{-Eu}_2\text{L}^{\text{SS}}_4$  (blue line) and  $\Delta\Delta\text{-Eu}_2\text{L}^{\text{RR}}_4$  (red line) recorded by monitoring the emission band of  $\text{Eu}^{3+}$  ions at 613 nm in THF ( $1.0 \times 10^{-5}$  M).

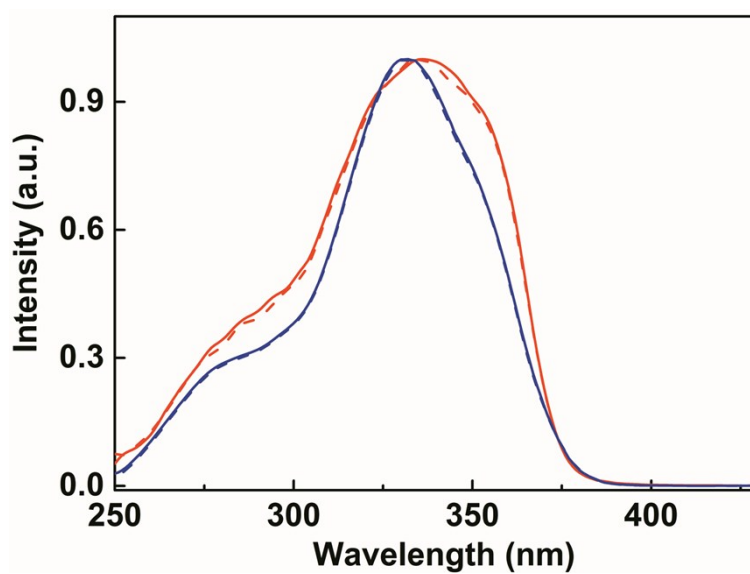

**Figure S25.** Normalization absorption (blue line,  $2.5 \times 10^{-6}$  M) and excitation spectra (red line,  $1.0 \times 10^{-5}$  M) of helicates in THF.

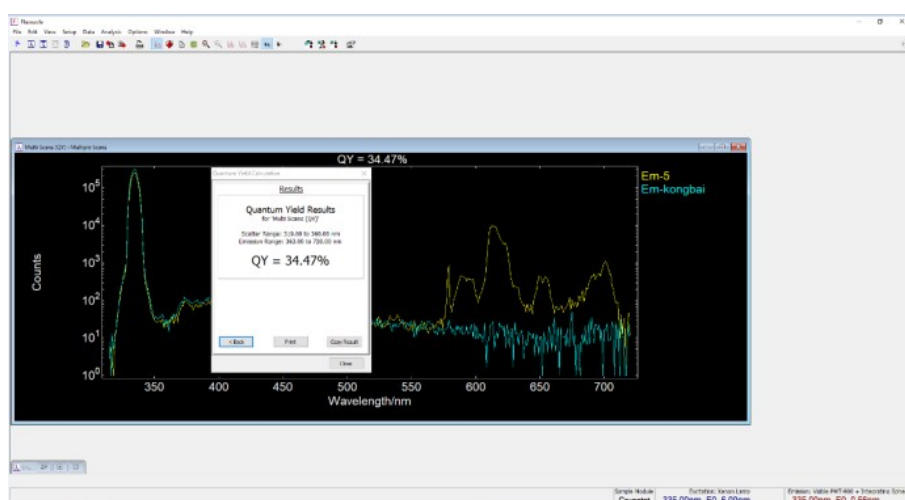

**Figure S26.** The screenshot of the luminescence quantum yield measurement of  $\Delta\Delta$ -Eu<sub>2</sub>L<sup>SS</sup><sub>4</sub>.

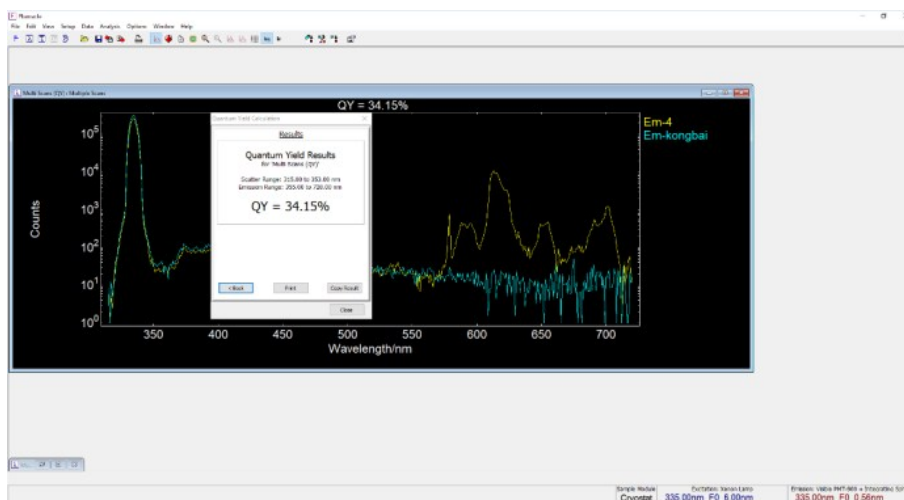

**Figure S27.** The screenshot of the luminescence quantum yield measurement of  $\Lambda\Lambda$ -Eu<sub>2</sub>L<sup>RR</sup><sub>4</sub>.

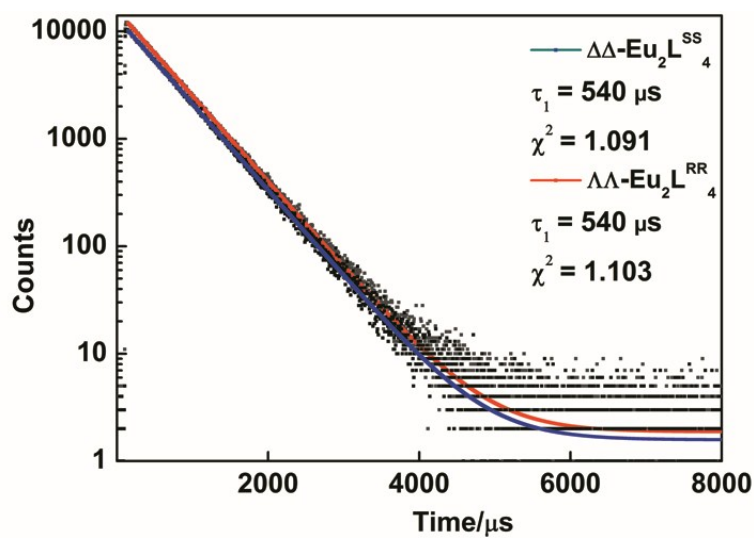

**Figure S28.** Luminescence decay curves of  $\Delta\Delta$ -Eu<sub>2</sub>L<sup>SS</sup><sub>4</sub> (blue line) and  $\Lambda\Lambda$ -Eu<sub>2</sub>L<sup>RR</sup><sub>4</sub> (red line) in THF monitored at 613nm.

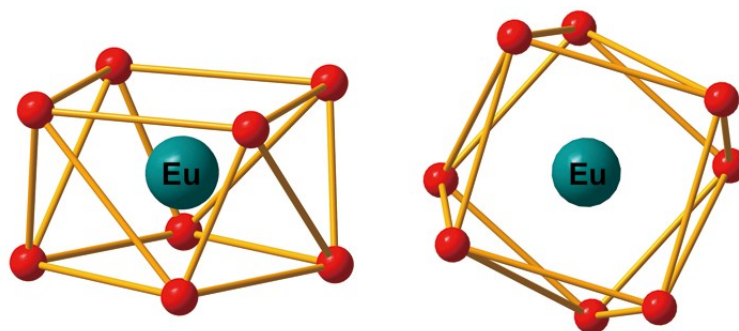

**Figure S29.** Side view (left) and top view (right) of the coordination polyhedra of  $\Delta\Delta$ -Eu<sub>2</sub>L<sup>SS</sup><sub>4</sub>.

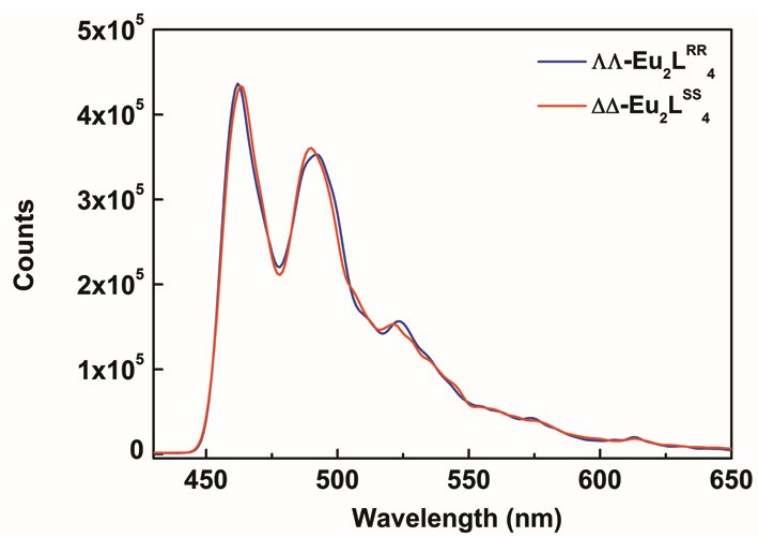

**Figure S30.** Phosphorescence spectra of  $\Delta\Delta\text{-Eu}_2\text{L}^{\text{SS}}_4$  (red line) and  $\Lambda\Lambda\text{-Eu}_2\text{L}^{\text{RR}}_4$  (blue line) in THF at 77 K.
